# Supplementary material for: γδ T cell receptor recognition of CD1d in a lipid-independent manner
Source: Research Square preprint supplement (doi:10.21203/rs.3.rs-7182106/v1), 2025-07-31
Supplement: Supplementary file 1 [file b7c334805657bc0893923c38.pdf]

**Supplementary Table 1 :  $\gamma\delta$  TCRs used within this study.**  $\gamma\delta$  TCRs: 2, 3, 6, 7 & 8 were previously identified from PBMC derived CD3+  $\gamma\delta$  T cells from ref 19.

| TCR    | Donor | Chain Usage               | CDR3 $\gamma$      | CDR3 $\delta$         |
|--------|-------|---------------------------|--------------------|-----------------------|
| 2      | 3     | V $\delta$ 1-V $\gamma$ 5 | CATWDRLYYKKLF      | CALGVWGDKLIF          |
| 3      | 3     | V $\delta$ 1-V $\gamma$ 2 | CATWDGLSYKKLF      | CALGELLVRSSLTAQLFF    |
| 6      | 5     | V $\delta$ 1-V $\gamma$ 9 | CALWEARPFYYKKLF    | CALGELWGFPNRDKLIF     |
| 7      | 6     | V $\delta$ 1-V $\gamma$ 5 | CATWDRPEANYKKLF    | CALGEPFLRSLIWEYTDKLIF |
| 8      | 6     | V $\delta$ 1-V $\gamma$ 5 | CATWDALAKLF        | CALGETFLPSLGGWTDKLIF  |
|        |       |                           |                    |                       |
| 9C2    |       | V $\delta$ 1-V $\gamma$ 5 | CATWDRGNPKTHYYKKLF | CALGDPGGLNTDKLIF      |
| DP10.7 |       | V $\delta$ 1-V $\gamma$ 4 | CATWDEKYKKLF       | CALGEPsyWGFPRTTRVIF   |

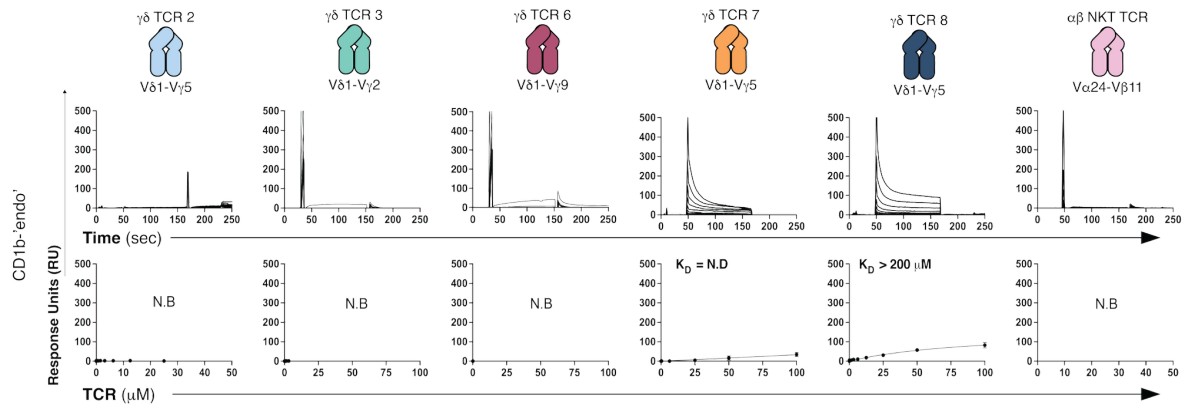

**Supplementary Figure 1:  $\gamma\delta$  TCR Affinity Measurements.** Affinity measurement analysis of  $\gamma\delta$  TCRs 2, 3 & 6, 7, 8 and the  $\alpha\beta$  NKT TCR determined by SPR against CD1b-'endo'. Sensograms are representative of a single dilution series. Error bars denote S.E.M. N=2, performed in duplicate.

**Supplementary Table 2. SEC-SAXS Data analysis.**

| <b>Sample</b>                                      | <b>Concentration<br/>(mg/mL)</b> | <b>Radius of<br/>Gyration,<br/><math>R_g</math> (Å)</b> | <b>Maximum<br/>Dimension,<br/><math>D_{max}</math> (Å)</b> | <b>Molecular<br/>Mass,<br/>from <math>V_p</math><br/>(kDa)</b> | <b>Oligomeric<br/>state from<br/><math>V_p</math></b> |
|----------------------------------------------------|----------------------------------|---------------------------------------------------------|------------------------------------------------------------|----------------------------------------------------------------|-------------------------------------------------------|
| $\gamma\delta$ TCR 2                               | 8.55                             | $43.4 \pm 0.36$                                         | 170                                                        | 95.9                                                           | 1.8                                                   |
| $\gamma\delta$ TCR 3                               | 8                                | $29.84 \pm 0.19$                                        | 114                                                        | 43.6                                                           | 0.8                                                   |
| $\gamma\delta$ TCR 6                               | 7.85                             | $30.3 \pm 0.20$                                         | 118                                                        | 46.2                                                           | 0.8                                                   |
| $\gamma\delta$ TCR 8                               | 7.25                             | $40.05 \pm 0.24$                                        | 149                                                        | 85.3                                                           | 1.5                                                   |
| CD1-endo                                           | 7                                | $27.14 \pm 0.02$                                        | 118                                                        | 51.8                                                           | 0.84                                                  |
| $\gamma\delta$ TCR 2<br>CD1d-<br>'endo'            | 8                                | $43.58 \pm 0.36$                                        | 163                                                        | 104                                                            | 1.1                                                   |
| $\gamma\delta$ TCR 3<br>CD1d-<br>'endo'            | 5                                | $40.81 \pm 0.31$                                        | 164                                                        | 76.5                                                           | 0.8                                                   |
| $\gamma\delta$ TCR 6<br>CD1d-<br>'endo'            | 7.85                             | $40.47 \pm 0.18$                                        | 155                                                        | 80                                                             | 0.8                                                   |
| $\gamma\delta$ TCR 7<br>CD1d- $\alpha$ -<br>GalCer | 4                                | $37.07 \pm 0.52$                                        | 157                                                        | 67.1                                                           | 0.7                                                   |
| $\gamma\delta$ TCR 8<br>CD1d-<br>'endo'            | 8                                | $40.86 \pm 0.19$                                        | 157                                                        | 88.2                                                           | 0.8                                                   |

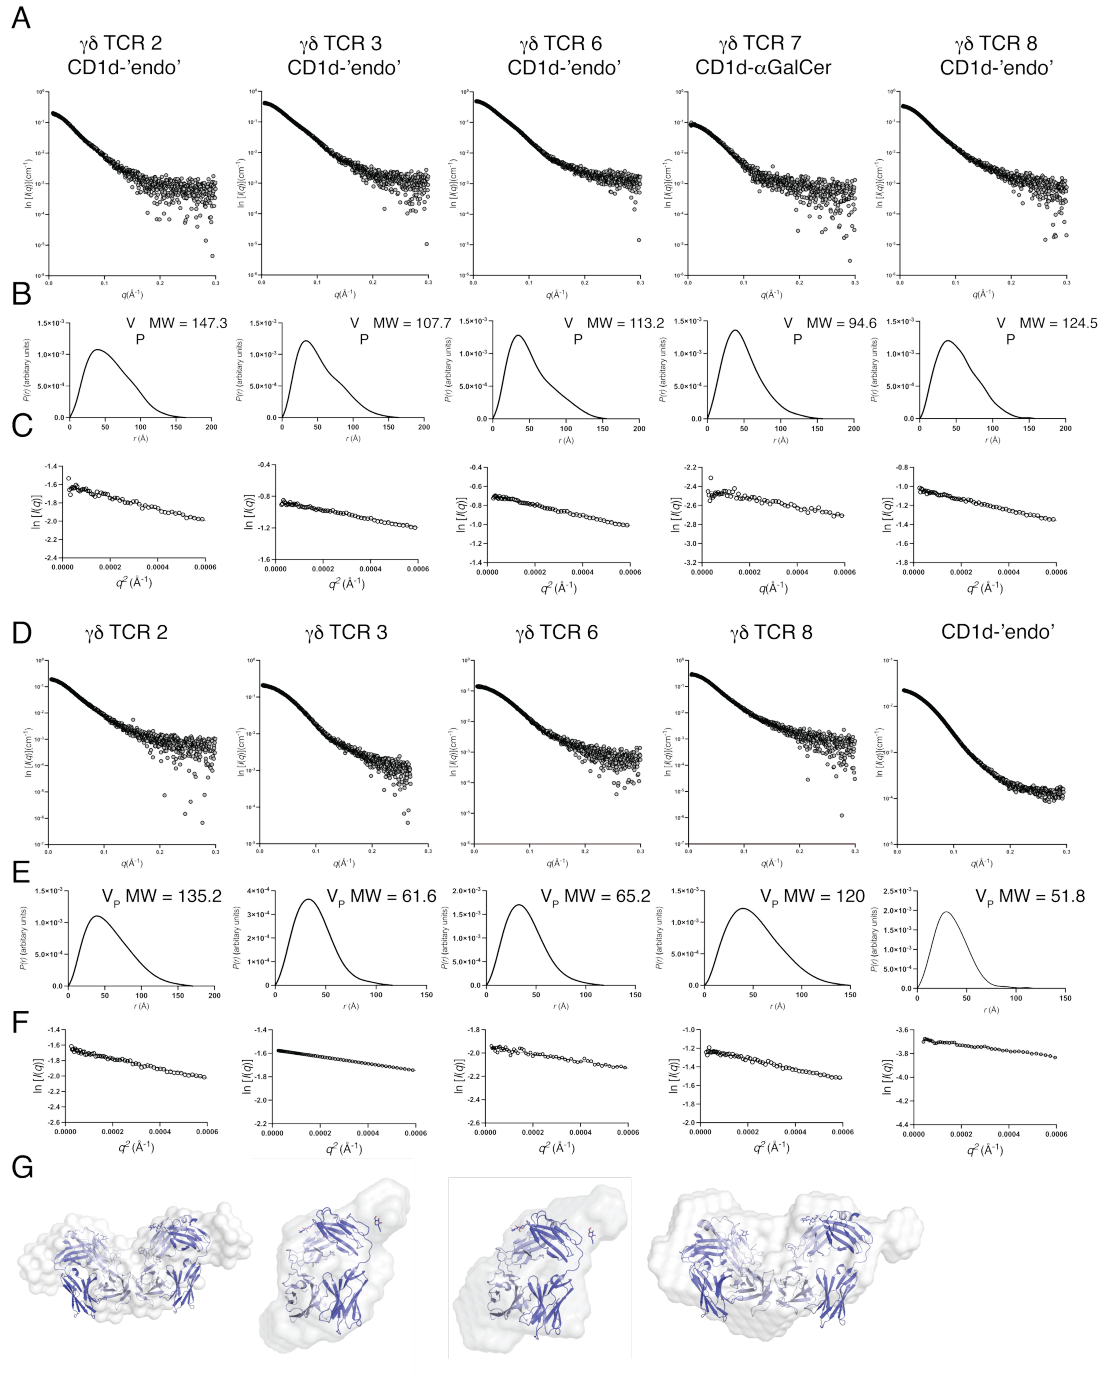

**Supplementary Figure 2:  $\gamma\delta$  TCR SEC-SAXS data collection.** SEC-SAXS scattering profile (A), P(r) distribution plot (B), Guinier analysis (C) and *ab initio* model (D) for  $\gamma\delta$  TCR 2,  $\gamma\delta$  TCR 3,  $\gamma\delta$  TCR 6 and  $\gamma\delta$  TCR 8 complexed with CD1d-'endo' or CD1d- $\alpha$ -GalCer. (D-G) SEC-SAXS monomer samples, scattering profile (D), P(r) plot (E), Guinier analysis (F) and *ab initio* reconstruction (G). Data was processed in BioXTSAS RAW software suite and GraphPad Prism 10.3.1. The 9C2  $\gamma\delta$  was aligned to the *ab initio* model, colored white, via DAMMIF, with  $\gamma/\delta$  chains in light and dark blue respectively.



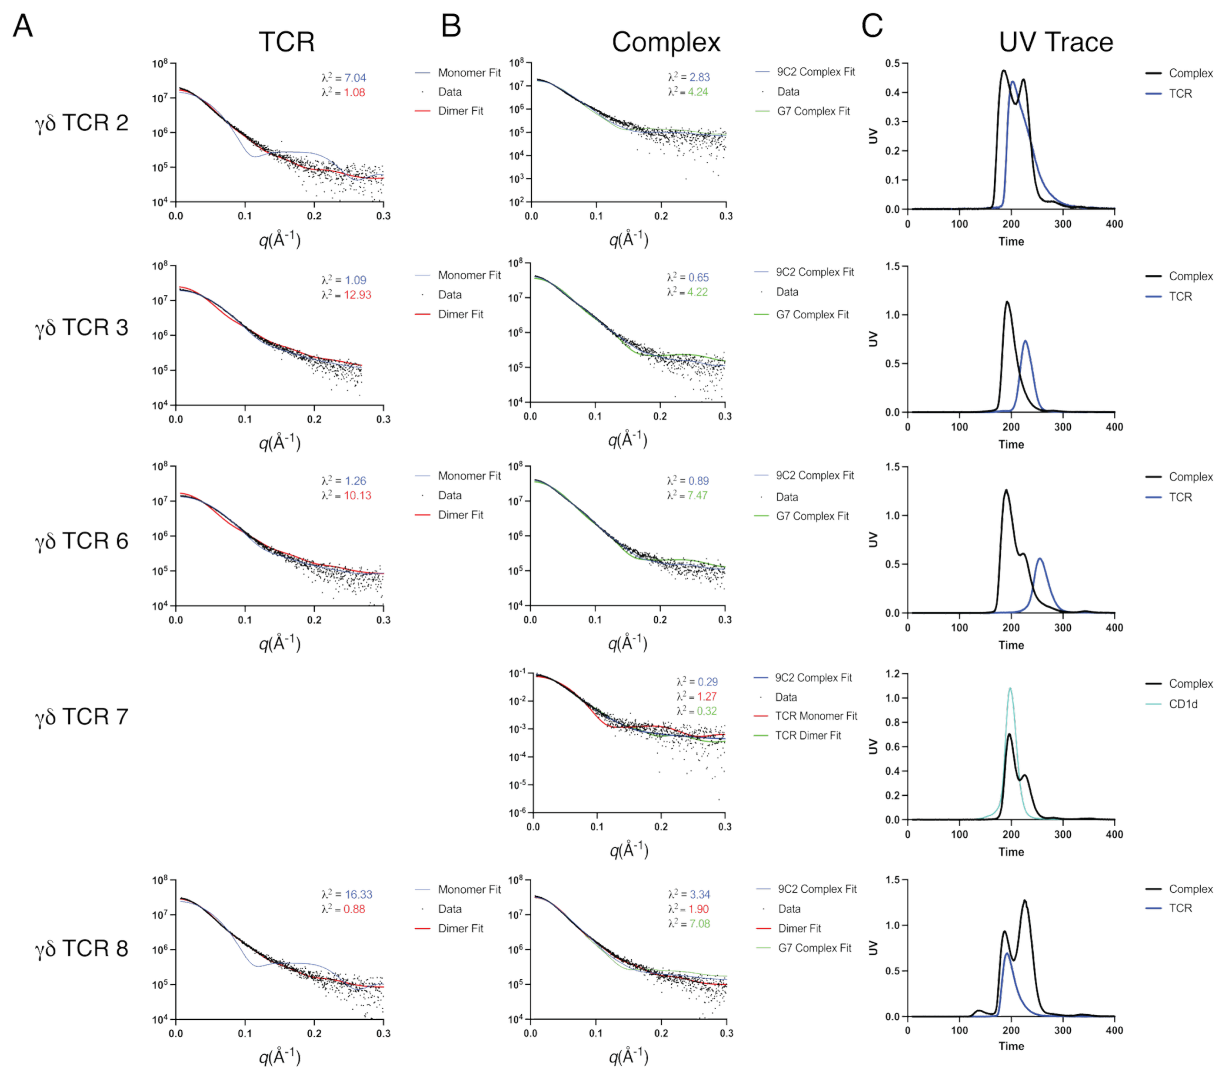

**Supplementary Figure 3: SEC-SAXS CRYSOLOG analysis.** CRYSOLOG analysis of  $\gamma\delta$  TCR 2,  $\gamma\delta$  TCR 3,  $\gamma\delta$  TCR 6 and  $\gamma\delta$  TCR 8, for TCR alone (A) or complexed to CD1d-‘endo’ (B). SEC UV Trace overlay comparing TCR alone and TCR-CD1d-‘endo’ was used to assess TCR co-complexation (C).

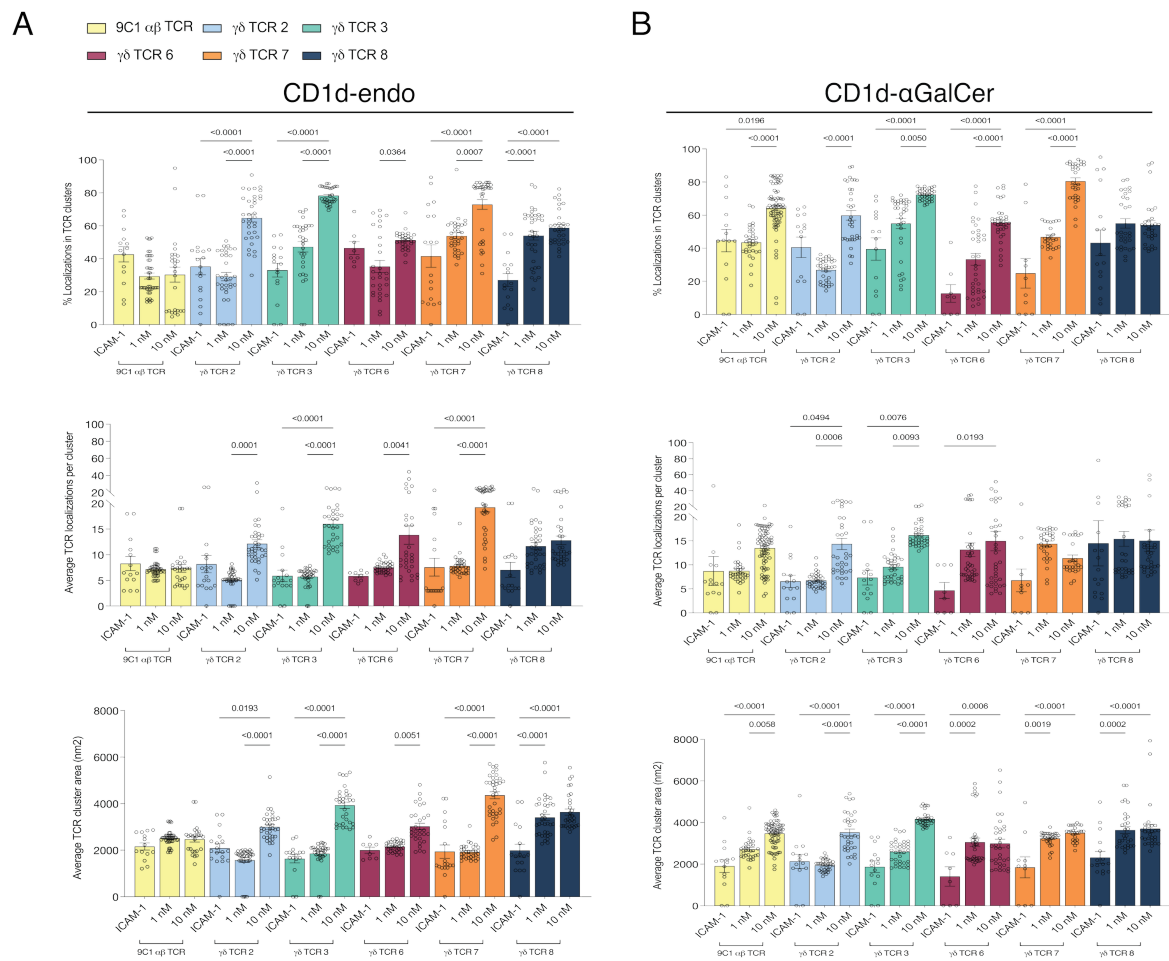

**Supplementary Figure 4: Analysis of dSTORM images from Figure 3.** DBSCAN was used to analyse CD1d-endo (A) and CD1d- $\alpha$ GalCer (B) induced clustering. Data was processed in GraphPad Prism 10.3.1.

A

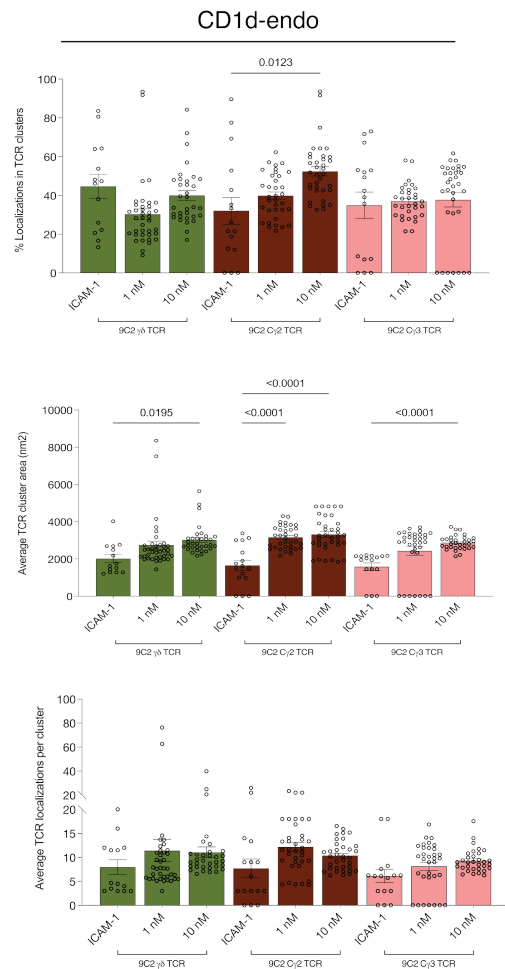

B

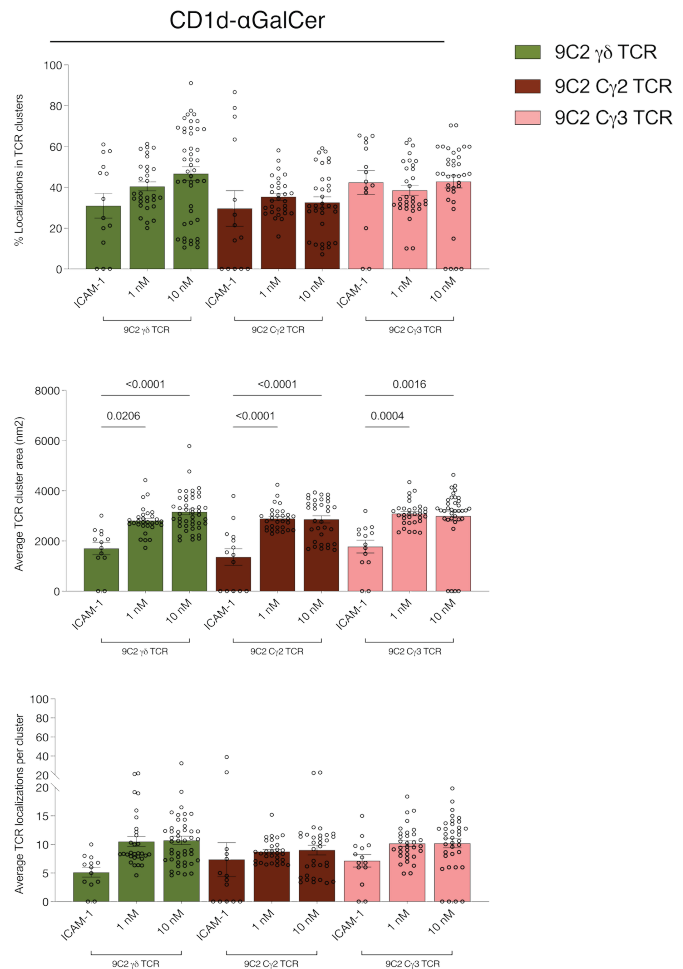

**Supplementary Figure 5: Analysis of *d*STORM images from Figure 4.** DBSCAN was used to analyse CD1d-endo (A) and CD1d- $\alpha$ GalCer (B) induced clustering. Data was processed in GraphPad Prism 10.3.1.

**Supplementary Table 3. Data collection and refinement statistics**

| $\gamma\delta$ TCR 2-CD1d-'endo'                    |                                |
|-----------------------------------------------------|--------------------------------|
| <b>Data collection</b>                              |                                |
| Temperature                                         | 100K                           |
| Resolution (Å)                                      | 46.65-2.86 (3.02-2.86)         |
| Space group                                         | P 43 21 2                      |
| Cell dimensions                                     |                                |
| <i>a</i> , <i>b</i> , <i>c</i> (Å)                  | 178.09, 178.09, 75.43          |
|                                                     | $\alpha=\beta=\gamma=90^\circ$ |
| No. of observations                                 | 296948 (43221)                 |
| No. of unique<br>observations                       | 28516 (4072)                   |
| <i>I</i> / $\sigma$ <i>I</i>                        | 16.4 (2.3)                     |
| Completeness (%)                                    | 99.8 (98.7)                    |
| Multiplicity                                        | 10.4 (10.6)                    |
| <i>R</i> <sub>merge</sub>                           | 0.106 (1.058)                  |
| <i>R</i> <sub>pim</sub>                             | 0.049 (0.491)                  |
| CC 1/2                                              | 0.999(0.750)                   |
| <b>Refinement</b>                                   |                                |
| <i>R</i> <sub>work</sub> / <i>R</i> <sub>free</sub> | 20.65/24.97                    |
| No. atoms                                           |                                |
| Protein                                             | 6400                           |
| Ligand/ion                                          | 142                            |
| <i>B</i> -factors                                   |                                |
| Protein                                             | 84.08                          |
| Ligand/ion                                          | 108.61                         |
| R.m.s. deviations                                   |                                |
| Bond lengths (Å)                                    | 0.005                          |
| Bond angles (°)                                     | 0.938                          |
| Ramachandran (%)                                    |                                |
| Favoured                                            | 97.20                          |
| Allowed                                             | 2.8                            |
| Outliers                                            | 0                              |

\*Values in parentheses are for highest-resolution shell.

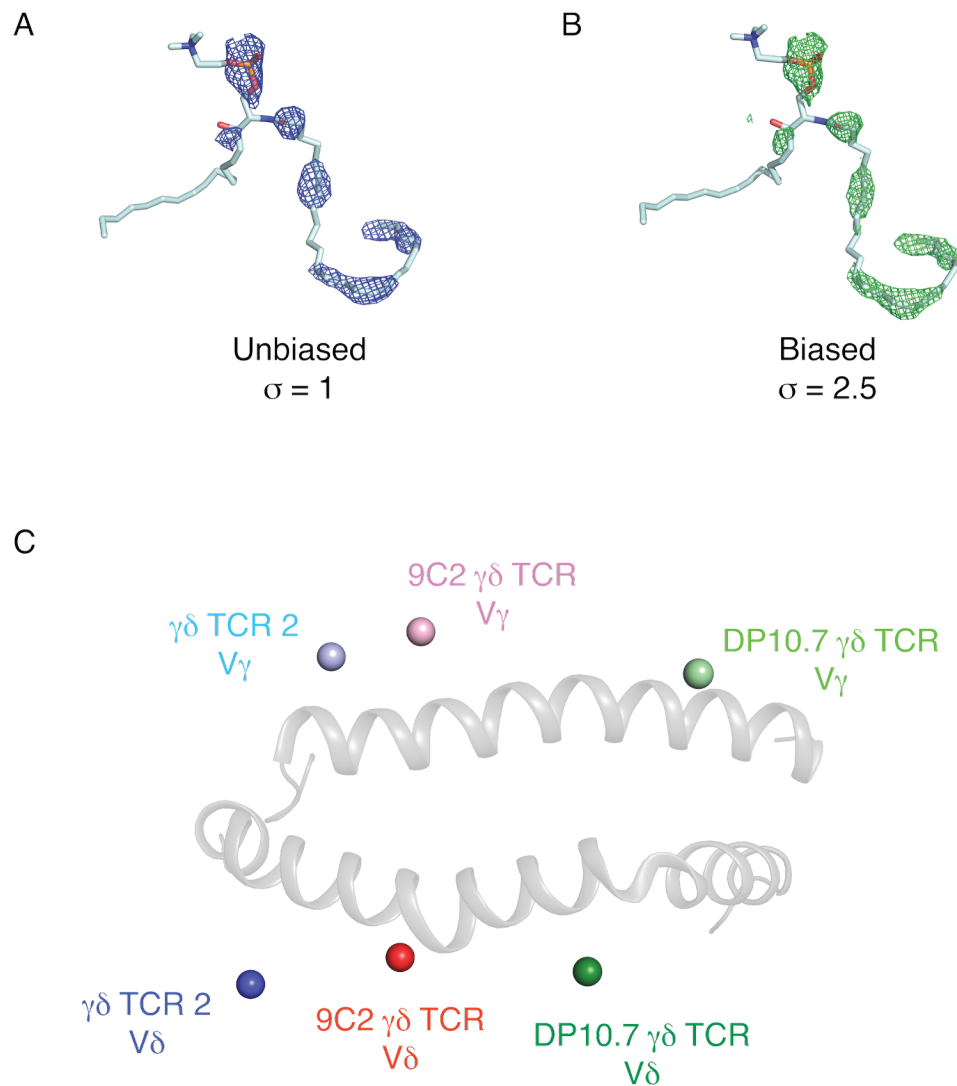

**Supplementary Figure 6: Electron density for  $\gamma\delta$  TCR-CD1d-endo lipid antigen.** Unbiased (A) and biased (B) density for the lipid antigen built into the antigen presenting cleft of CD1d-endo. The sphingomyelin lipid antigen built into the density is shown as sticks. (C) Variable domain COM for  $\gamma\delta$  TCR 2, 9C2  $\gamma\delta$  TCR and DP10.7  $\gamma\delta$  TCR.  $V_\gamma/V_\delta$  shown in light and dark variants of blue, red and green. CD1d shown in grey.

**Supplementary Table 4.  $\gamma\delta$  TCR 2 contacts with CD1d-‘endo’.**

| TCR Gene      | TCR Residues                             | CD1d Residues                             | Bond Type |
|---------------|------------------------------------------|-------------------------------------------|-----------|
| CDR1 $\gamma$ | Ile31                                    | Trp153                                    | VDW       |
|               | Phe34                                    | His68, Ile69                              | VDW       |
|               | Tyr35                                    | Gln61, Glu64, Thr65, His68                | VDW       |
| FW $\gamma$   | His37                                    | Gln61                                     |           |
|               | Arg49 <sup>NH1</sup>                     | Gln61 <sup>O<math>\epsilon</math>1</sup>  | HB        |
|               | Arg49                                    | Gln61                                     | VDW       |
|               | Tyr52                                    | Gln61                                     | VDW       |
| CDR2 $\gamma$ | Asp54 <sup>O<math>\delta</math>1,2</sup> | His68 <sup>N<math>\epsilon</math>2</sup>  | HB        |
|               | Ser56                                    | His68                                     | VDW       |
|               | Asn57                                    | Arg71                                     | VDW       |
| CDR3 $\gamma$ | Arg103                                   | Trp153, Glu156                            | VDW       |
|               | Leu104                                   | Glu156, Trp160                            | VDW       |
|               | Tyr105                                   | Thr65, Trp160                             | VDW       |
| CDR1 $\delta$ | Trp33                                    | Glu175                                    | VDW       |
|               | Ser34                                    | Gln168                                    | VDW       |
| CDR3 $\delta$ | Val98                                    | Gln62                                     | VDW       |
|               | Trp99                                    | Phe58, Gln62, Trp160, Thr165, Gln168      | VDW       |
|               | Trp99 <sup>N<math>\epsilon</math>1</sup> | Gln168 <sup>O<math>\epsilon</math>1</sup> | HB        |
|               | Trp99 <sup>O</sup>                       | Gln62 <sup>N<math>\epsilon</math>2</sup>  | HB        |
|               | Gly100 <sup>O</sup>                      | Gln61 <sup>N<math>\epsilon</math>2</sup>  | HB        |
|               | Gly100                                   | Gln61                                     | VDW       |
|               | Asp101                                   | Ser59, Gln61                              | VDW       |
|               |                                          |                                           |           |
|               |                                          |                                           |           |
|               |                                          |                                           |           |

HB: Hydrogen bond, VDW: Van der Waals, SB: salt bridge. Cut-off at 4 Å for VDW interactions and SB, 3.5 Å for HB.

A  $\gamma\delta$  TCR-2

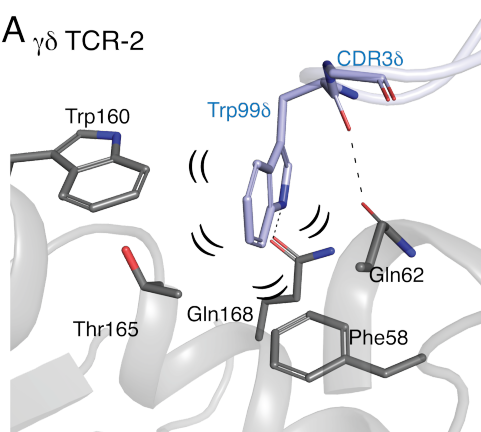

B VHH1D12

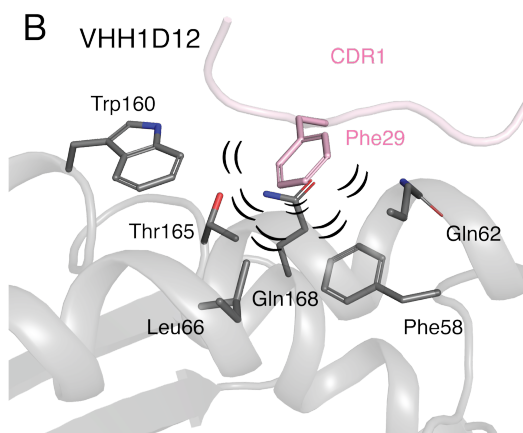

C 9C2  $\gamma\delta$  TCR

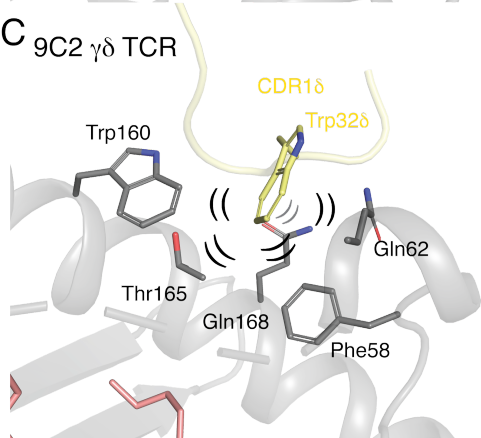

D 9B4  $\delta/\alpha\beta$  TCR

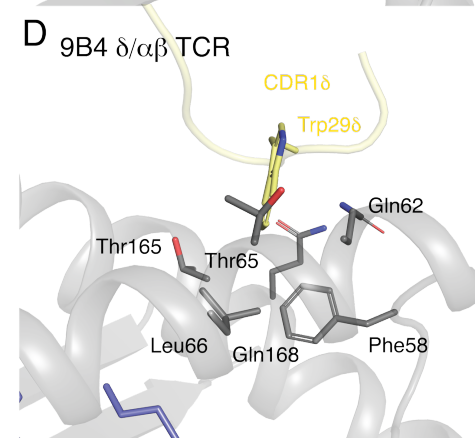

E DP.10  $\gamma\delta$  TCR

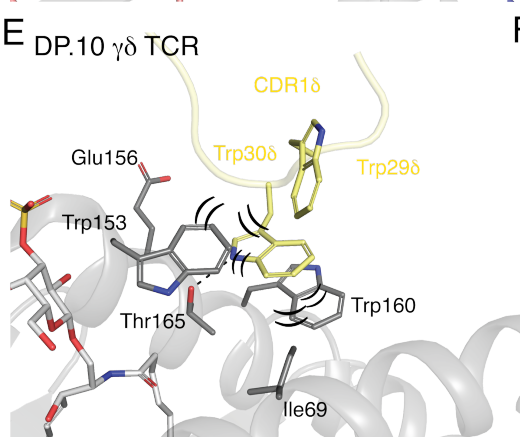

F 9C1  $\alpha\beta$  TCR

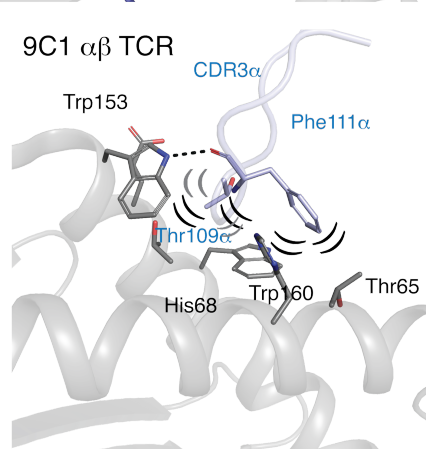

G 9B2  $\alpha\beta$  TCR

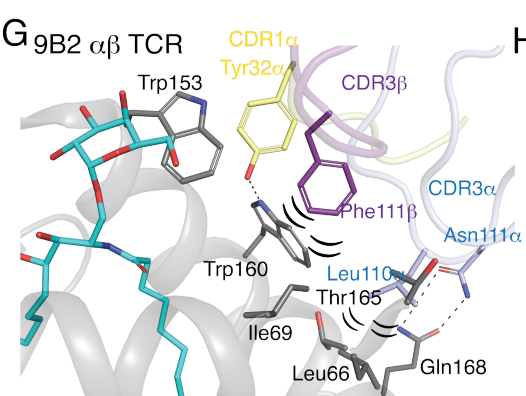

H

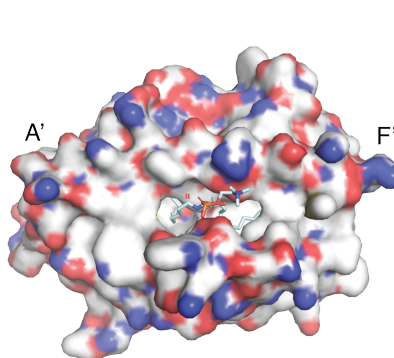

**Supplementary Figure 7: A conserved CD1d binding motif.** Comparison of interactions between the A' of CD1d and  $\gamma\delta$  TCR 2 (A), VHH1D12 (B), 9C2 (C), DP.10 (D), 9B4 (E), 9C1 (F) and 9B2 (G) . Surface charge of CD1d (F). CD1d is shown in dark grey, CDR1  $\alpha/\delta$  in yellow, CDR3  $\alpha/\delta$  in light blue and CDR3 $\gamma$  in purple.
